# Supplementary material for: Individual Diet Optimization in French Adults Shows That Plant-Based “Dairy-like” Products May Complement Dairy in Sustainable Diets
Source: MDPI journal article supplement (doi:10.3390/su14052817), 2022-02-28

# Individual diet optimization on French adults shows that plant-based “dairy-like” products may complement dairy in sustainable diets

Rozenn Gazan et al.

## Online Supplementary Material

### Supplemental File S2. Results in men

Supplemental file S2, Table S2. Mean daily energy intake, total food quantity consumed, carbon impact and indicators of the nutritional quality of men’s observed diets (n=752) according to PBDL product consumption

|                                            | All (n=752)     | PBDL product non-consumers (n=733) | PBDL product consumers (n=19) |        |         |
|--------------------------------------------|-----------------|------------------------------------|-------------------------------|--------|---------|
|                                            | Mean ± SD       | Mean                               | Mean                          | Pval*  | Pval†,§ |
| Energy intake (kcal/d)                     | 2568.2 ± 584.6  | 2570.5 ± 586.5                     | 2480.3 ± 512.3                | 0.507  | 0.35    |
| Total quantity (g/d)                       | 2899.9 ± 770.2  | 2891.7 ± 768.8                     | 3210 ± 778.7                  | 0.075  | 0.146   |
| Liquid quantity (g/d)                      | 1595 ± 644.5    | 1589.4 ± 642.7                     | 1810.5 ± 693.9                | 0.14   | 0.229   |
| Solid quantity (g/d)                       | 1304.8 ± 350.9  | 1302.4 ± 349.8                     | 1399.6 ± 390.7                | 0.233  | 0.325   |
| PBDL products (g/d)                        | 2.6 ± 23.1      | 0 ± 0                              | 104.1 ± 105.3                 | <0.001 | <0.001  |
| Energy density£ (kcal/g)                   | 180.8 ± 31.6    | 181 ± 31.5                         | 169.7 ± 33.8                  | 0.123  | 0.094   |
| MAR (mean adequacy ratio) (%)              | 86.1 ± 9        | 86 ± 9                             | 87.9 ± 9.3                    | 0.367  | 0.644   |
| MER (mean excess ratio) (%)                | 146 ± 34.6      | 146 ± 34.6                         | 145 ± 34                      | 0.898  | 0.849   |
| Carbon impact (g CO2eq/d)                  | 4881.7 ± 1239.9 | 4906.5 ± 1238.4                    | 3923.9 ± 879.1                | 0.001  | <0.001  |
| Total quantity of animal products (g/d), ¥ | 480.3 ± 191.6   | 483.8 ± 192                        | 343.3 ± 110.9                 | 0.002  | <0.001  |
| No. of different consumed foods per week   | 53 ± 13.2       | 52.8 ± 13.2                        | 60.7 ± 11                     | 0.009  | 0.034   |

\* Test of the differences in intake or indicators between PBDL product consumers and non-consumers, using a linear generalized model; † Test with adjustment for total energy intake, age, family status, educational level and physical activity level (energy intake adjustment was removed from the difference in energy intakes test).; ¥ Total quantity of animal products consumed, including all meat, eggs, fish and dairy products as well as animal products present as ingredients in mixed dishes; £ Energy density was calculated on consumed solid foods only. MAR: mean adequacy ratio; MER: mean excess ration; PBDL: plant-based “dairy-like”.

**Supplemental file S2, Figure S1. Mean quantities of Fruits & vegetables, Grains & potatoes, Meat/fish/eggs & legumes, Dairy products & alternatives, Sweetened & salty products, Water & drinks groups and subgroups in the observed diets of French men (n=739) and in their optimized diets (n=739).**

### Fruits & vegetables<sup>a</sup>

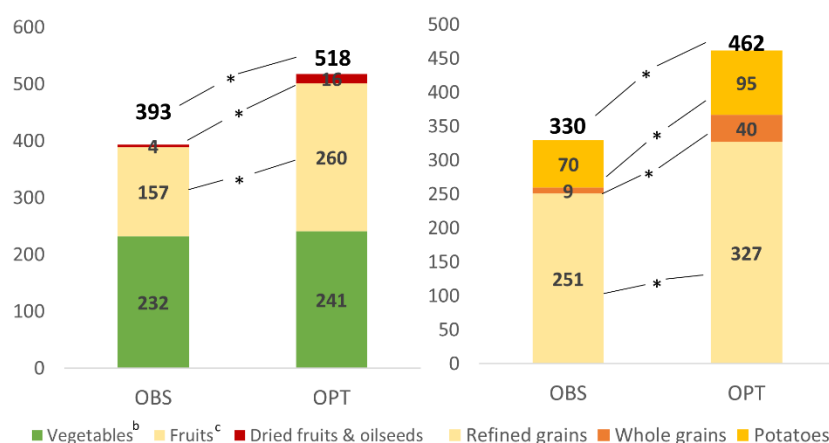

### Grains & potatoes

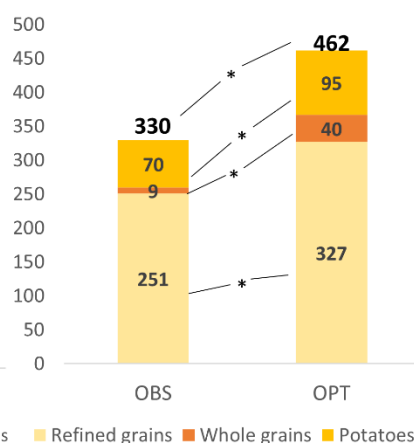

### Meat/fish/eggs & legumes

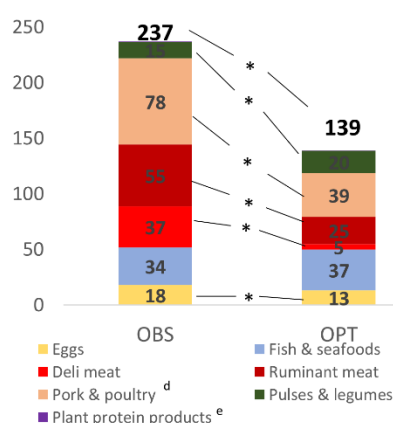

### Dairy products & alternatives

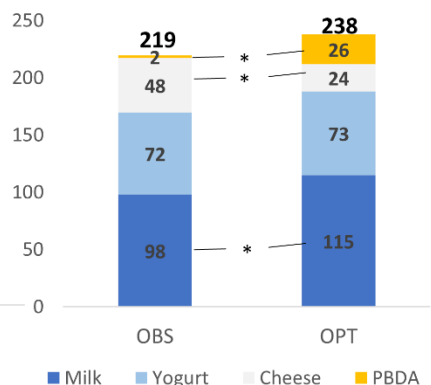

### Sweetened & salty products

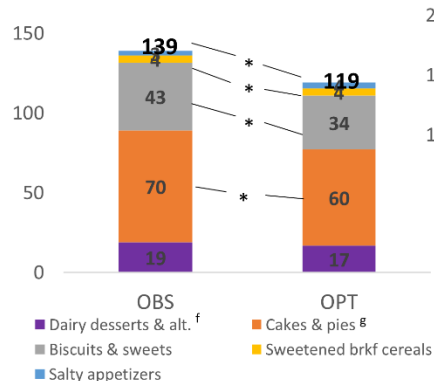

### Water & drinks

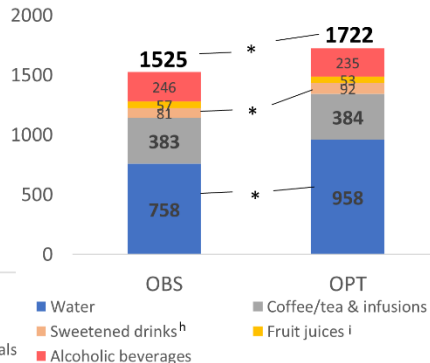

OBS, observed diet; OPT, optimized diet \*Indicates significantly different quantities ; <sup>a</sup>including oilseeds; <sup>b</sup>including soups ; <sup>c</sup>including processed fruits, excluding fruit juices ; <sup>d</sup>including offal ; <sup>e</sup>including tofu ; <sup>f</sup>including PB desserts ; <sup>g</sup>including pastries ; <sup>h</sup>including PB drinks ; <sup>i</sup>fruit juices with no added sugar ; The total quantity of "Fats & seasoning" (not displayed in Fig. 1) decreased from 57.1 g in observed diets to 43.4 g in optimized ones. Composite dishes were disaggregated within subgroups.

**Supplemental file S2, Table S3. Mean energy content, mean diet weight and mean dairy products & alternatives quantities (g/d) in observed diets and diets optimized with the “SUS-All-Foods” set of models, according to the tracking of PBDL product in the optimized diets£: i.e. OptStillNoPB (n=369), OptAddedPB (n=351) and OptStillPB (n=19)**

|                               | OptStillNoPB (n=369) |                              | OptAddedPB (n=351) |                              | ObsStillPB (n=19) |                              | Pval observed* | Pval optimized * |
|-------------------------------|----------------------|------------------------------|--------------------|------------------------------|-------------------|------------------------------|----------------|------------------|
|                               | Observed ± SD        | Optimised ± SD               | Observed ± SD      | Optimised ± SD               | Observed ± SD     | Optimised ± SD               |                |                  |
| Total energy content (kcal/d) | 2822.8 ± 521.2       | 2799.7 <sup>ns</sup> ± 511.5 | 2293.5 ± 400.1     | 2282.9 <sup>ns</sup> ± 390.4 | 2470.3 ± 508.1    | 2452.9 <sup>ns</sup> ± 494.1 | <.0001         | <.0001           |
| Total diet weight (g/d)       | 3240.3 ± 713.8       | 3395 ± 505.6                 | 2525.7 ± 597.8     | 3072.2 ± 291.9               | 3210 ± 778.7      | 3373.7 ± 525.7               | <.0001         | <.0001           |
| Dairy products & alternatives | 291 ± 219.5          | 273.6 <sup>ns</sup> ± 191.5  | 142.9 ± 97.7       | 200 ± 111.8                  | 244.5 ± 147.3     | 241.9 <sup>ns</sup> ± 141    | <.0001         | <.0001           |
| Milk                          | 148.2 ± 190.8        | 158.6 <sup>ns</sup> ± 169.3  | 47.2 ± 82.9        | 72 ± 89.2                    | 54.4 ± 109.1      | 51.7 <sup>ns</sup> ± 110.1   | <.0001         | <.0001           |
| Yoghurt                       | 89.8 ± 100.6         | 91.4 <sup>ns</sup> ± 99.8    | 53.8 ± 63          | 55.2 <sup>ns</sup> ± 63      | 56.7 ± 52.7       | 56.7 <sup>ns</sup> ± 52.7    | <.0001         | <.0001           |
| Cheese                        | 53 ± 35.3            | 23.6 ± 18.8                  | 41.9 ± 26.1        | 23.6 ± 17.2                  | 45.5 ± 24.1       | 23.5 ± 20.8                  | <.0001         | 0.87             |
| PBDAs                         | 0 ± 0                | 0 ± 0                        | 0 ± 0              | 49.3 ± 67                    | 87.9 ± 97.8       | 110 <sup>ns</sup> ± 107.2    | <.0001         | <.0001           |
| Sweetened & salty products    | 156 ± 97.7           | 140.1 ± 86.4                 | 117.6 ± 78.8       | 94.5 ± 67.1                  | 196.6 ± 104.2     | 163.1 <sup>ns</sup> ± 100.1  | <.0001         | <.0001           |
| Incl. PB desserts             | 0 ± 0                | 0 ± 0                        | 0 ± 0              | 1.4 ± 7.8                    | 16.2 ± 52.8       | 18.7 <sup>ns</sup> ± 53.1    | <.0001         | <.0001           |
| Water & drinks                | 1697.2 ± 684.5       | 1767.2 <sup>ns</sup> ± 561.8 | 1334 ± 557.6       | 1668 ± 363.6                 | 1709 ± 717.9      | 1839 <sup>ns</sup> ± 566.3   | <.0001         | 0.196            |
| Incl. PB drinks               | 0 ± 0                | 0 ± 0                        | 0 ± 0              | 35 ± 54.4                    | 0 ± 0             | 8.4 <sup>ns</sup> ± 18.8     | .              | <.0001           |

\*p-value of a general linear model test used to assess the difference in food intake in observed or optimized diets between the tracking of PBDL products, adjusted for age, family status, educational level and physical activity level; ns indicates food groups or subgroups for which the differences (accounted for repeated measurements) between observed and optimized diets were not significant ( $p>0.05$ ) among OptStillNoPB, OptStillPB or OptAddedPB men; £ Individuals with no PBDL product in their observed and optimized diets were categorized as OptStillNoPB. Individuals without PBDL products in their observed diet but with an addition of said products to their optimized diet were categorized as OptAddedPB. Individuals with PBDL products in both their observed and optimized diets were categorized as OptStillPB. The distinction between OptStillNoPB, OptAddedPB and OptStillPB also refer to the “tracking” of PBDL products (i.e. presence of PBDL products in optimized diets and novelty or not vs observed diet). PB: plant-based; PBDAs: plant-based dairy alternatives; PBDL: plant-based “dairy-like”

Supplemental File S2, Figure S2. Dairy products and PBDL products (g/d) in observed and optimized diets, according to PBDL product tracking sub-populations

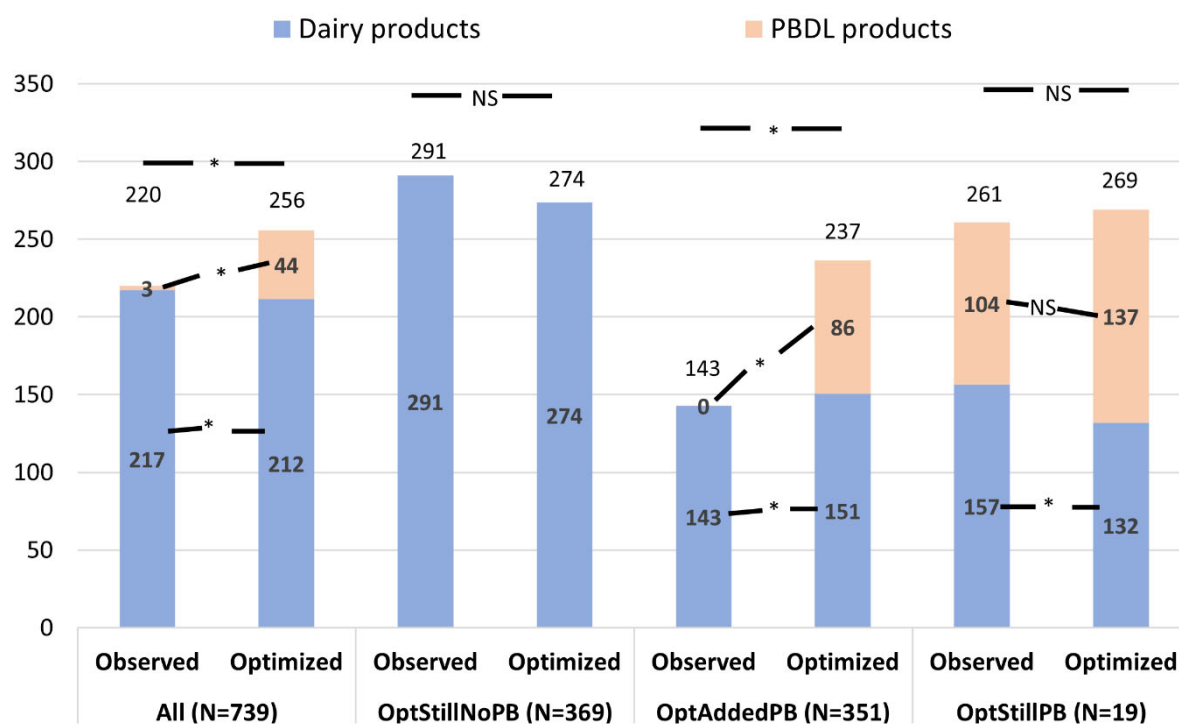

PBDL products include PBDAs (soy-based drinks, soy-based alternatives to plain yoghurt and soy-based alternatives to fruit yogurt), PB desserts (soy-based desserts) and PB drinks (almond-based drinks and oat-based drinks); \* p-value <0.05

Supplemental File S2. Figure S3. Percentage of men having PBDL products in observed and optimized diets, using fortified (A) or unfortified (B) PBDL products.

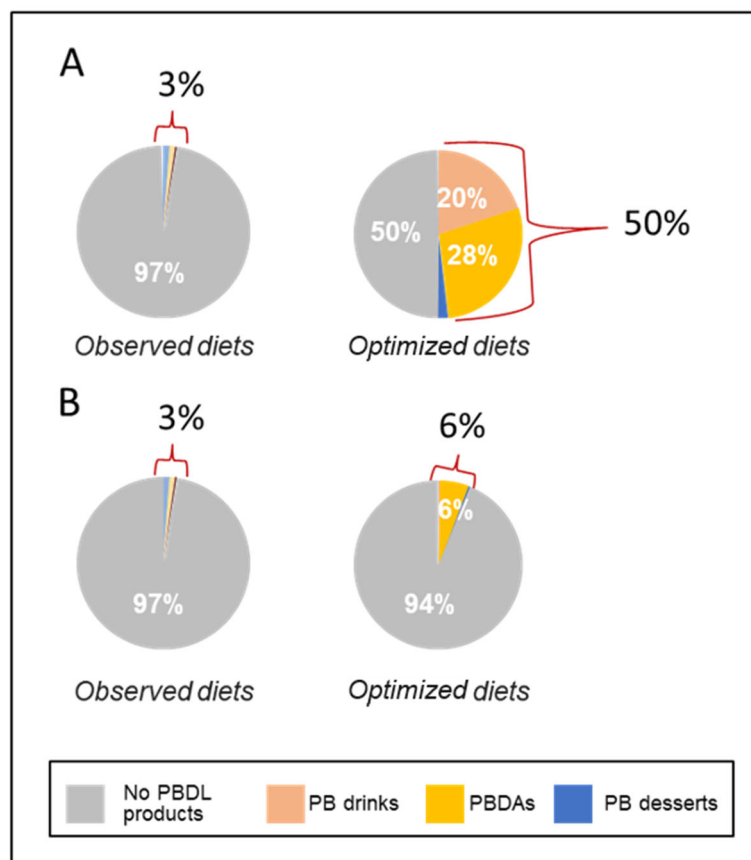

Supplement: s1 [file s1]
