# Supplementary material for: Individual Diet Optimization in French Adults Shows That Plant-Based “Dairy-like” Products May Complement Dairy in Sustainable Diets
Source: MDPI journal article supplement (doi:10.3390/su14052817), 2022-02-28
Supplement: s1 [file s1]

# Individual diet optimization on French adults shows that plant-based “dairy-like” products may complement dairy in sustainable diets

Rozenn Gazan et al.

## Online Supplementary Material

### Supplemental File S3.

**Supplemental File S3 Table S1. Carbon impact and nutritional composition of each PBDL product in comparison with dairy products, sweetened drinks and desserts (/100 g)**

| Group                                       | Dairy products & alternatives  |                                         |                                         |                    |                          | Sweetened & salty products    |                  | Water & drinks      |                  |                 |
|---------------------------------------------|--------------------------------|-----------------------------------------|-----------------------------------------|--------------------|--------------------------|-------------------------------|------------------|---------------------|------------------|-----------------|
| Subgroup                                    | Plant-based dairy alternatives |                                         |                                         | Milk               | Yogurt                   | Dairy desserts & alternatives |                  | Sweetened drinks    |                  |                 |
|                                             | Soya-based drink               | Soya-based alternative to plain yoghurt | Soya-based alternative to fruit yoghurt | Semi-skimmed milk  | Semi-Skimmed milk yogurt | Soya-based dessert            | Cream dessert    | Almond-based drink* | Oat-based drink* | Fizzy drink     |
| Carbon impact ( <i>g CO<sub>2</sub>eq</i> ) | 48 <sup>a</sup>                | 56 <sup>a</sup>                         | 56 <sup>a</sup>                         | 121.4 <sup>c</sup> | 202.8 <sup>c</sup>       | 56 <sup>a</sup>               | 170 <sup>c</sup> | 42 <sup>b</sup>     | 35 <sup>b</sup>  | 44 <sup>c</sup> |
| Energy (kcal)                               | 42.00                          | 46.50                                   | 68.00                                   | 46.06              | 68.91                    | 75.50                         | 128.63           | 22.00               | 43.00            | 29.38           |
| Proteins (g)                                | 3.30                           | 4.00                                    | 3.60                                    | 3.31               | 3.91                     | 2.75                          | 3.80             | 0.40                | 0.30             | 0.03            |
| Carbohydrates (g)                           | 2.70                           | 1.05                                    | 8.10                                    | 4.84               | 9.08                     | 11.80                         | 20.07            | 2.40                | 6.60             | 7.11            |
| Total fat (g)                               | 1.90                           | 2.30                                    | 2.10                                    | 1.53               | 1.57                     | 1.90                          | 3.84             | 1.10                | 1.50             | 0.00            |
| MUFA (g)                                    | 0.40                           | 0.50                                    | 0.50                                    | 0.49               | 0.34                     | 0.60                          | 0.83             | 0.70                | 0.70             | 0.00            |
| PUFA (g)                                    | 1.20                           | 1.40                                    | 1.20                                    | 0.05               | 0.05                     | 1.00                          | 0.09             | 0.30                | 0.70             | 0.00            |
| a-linolenic (g)                             | 0.12                           | 0.20                                    | 0.11                                    | 0.01               | 0.01                     | 0.00                          | 0.01             | 0.00                | 0.01             | 0.00            |
| Linoleic (g)                                | 0.88                           | 0.55                                    | 0.91                                    | 0.04               | 0.04                     | 1.00                          | 0.07             | 0.00                | 0.50             | 0.00            |
| Fibre (g)                                   | 0.60                           | 1.00                                    | 1.00                                    | 0.00               | 0.09                     | 0.55                          | 0.18             | 0.40                | 1.40             | 0.00            |
| Water (g)                                   | 91.90                          | 90.40                                   | 80.80                                   | 89.59              | 84.29                    | 81.40                         | 71.23            | 96.00               | 90.50            | 92.46           |
| Sodium (mg)                                 | 40.00                          | 100.00                                  | 92.00                                   | 43.41              | 54.01                    | 54.00                         | 65.22            | 56.00               | 36.00            | 5.81            |
| Alcohol (g)                                 | 0.00                           | 0.00                                    | 0.00                                    | 0.00               | 0.00                     | 0.00                          | 0.00             | 0.00                | 0.00             | 0.00            |
| EPA (g)                                     | 0.00                           | 0.00                                    | 0.00                                    | 0.00               | 0.00                     | 0.00                          | 0.00             | 0.00                | 0.00             | 0.00            |
| DHA (g)                                     | 0.00                           | 0.00                                    | 0.00                                    | 0.00               | 0.00                     | 0.00                          | 0.00             | 0.00                | 0.00             | 0.00            |
| Omega 3 (g)                                 | 0.12                           | 0.20                                    | 0.11                                    | 0.01               | 0.01                     | 0.00                          | 0.02             | 0.00                | 0.02             | 0.00            |
| Saturated fatty acids (g)                   | 0.30                           | 0.40                                    | 0.40                                    | 0.93               | 0.84                     | 0.30                          | 1.53             | 0.10                | 0.10             | 0.00            |
| Cholesterol (mg)                            | 0.00                           | 0.00                                    | 0.00                                    | 6.46               | 4.67                     | 0.00                          | 23.19            | 0.00                | 0.00             | 0.00            |

|                       |        |        |        |        |        |        |        |        |        |       |
|-----------------------|--------|--------|--------|--------|--------|--------|--------|--------|--------|-------|
| EPA DHA (g)           | 0.00   | 0.00   | 0.00   | 0.00   | 0.00   | 0.00   | 0.00   | 0.00   | 0.00   | 0.00  |
| Total sugar (g)       | 2.50   | 1.05   | 7.90   | 4.60   | 8.07   | 9.05   | 16.25  | 2.40   | 3.20   | 7.04  |
| Free sugar (g)        | 2.47   | 1.03   | 7.72   | 0.00   | 4.01   | 8.99   | 14.20  | 2.30   | 3.15   | 7.04  |
| Potassium (mg)        | 98.00  | 79.30  | 80.70  | 166.78 | 143.07 | 228.00 | 145.64 | 25.00  | 32.00  | 2.63  |
| Magnesium (mg)        | 14.50  | 21.70  | 19.00  | 12.37  | 9.80   | 36.10  | 14.57  | 0.00   | 2.30   | 2.41  |
| Calcium (mg)          | 120.00 | 120.00 | 120.00 | 108.76 | 134.77 | 120.00 | 114.32 | 125.00 | 120.00 | 2.03  |
| Copper (mg)           | 0.10   | 0.06   | 0.05   | 0.01   | 0.01   | 0.17   | 0.04   | 0.00   | 0.01   | 0.00  |
| Iron (mg)             | 0.30   | 0.00   | 0.00   | 0.05   | 0.09   | 3.00   | 0.19   | 0.10   | 0.00   | 0.04  |
| Phosphorus (mg)       | 65.50  | 27.30  | 86.00  | 91.86  | 95.35  | 72.00  | 89.47  | 15.00  | 11.00  | 11.49 |
| Iodine (µg)           | 0.00   | 0.00   | 0.00   | 11.47  | 12.19  | 0.00   | 5.47   | 0.00   | 0.00   | 0.40  |
| Zinc (mg)             | 0.27   | 0.12   | 0.11   | 0.40   | 0.43   | 0.29   | 0.28   | 0.10   | 0.03   | 0.01  |
| Selenium (µg)         | 25.00  | 5.00   | 5.00   | 0.94   | 1.54   | 5.00   | 1.56   | 0.00   | 10.00  | 1.07  |
| Vitamin A (RE)        | 0.00   | 0.00   | 0.00   | 24.22  | 16.26  | 0.15   | 12.37  | 0.00   | 0.00   | 0.29  |
| Vitamin C (mg)        | 0.00   | 0.00   | 0.00   | 1.40   | 0.29   | 0.00   | 0.18   | 0.00   | 0.00   | 0.00  |
| Vitamin D (µg)        | 0.75   | 0.75   | 0.75   | 0.01   | 0.17   | 0.75   | 0.30   | 0.75   | 0.75   | 0.00  |
| Vitamin E (mg)        | 0.00   | 0.60   | 0.00   | 0.04   | 0.04   | 0.00   | 0.07   | 1.80   | 0.00   | 0.00  |
| Thiamin (mg)          | 0.00   | 0.00   | 0.00   | 0.04   | 0.04   | 0.00   | 0.01   | 0.00   | 0.00   | 0.00  |
| Riboflavin (mg)       | 0.21   | 0.00   | 0.21   | 0.18   | 0.19   | 0.21   | 0.16   | 0.21   | 0.21   | 0.00  |
| Niacin (mg)           | 0.12   | 0.08   | 0.10   | 0.10   | 0.14   | 0.08   | 0.10   | 0.10   | 0.05   | 0.00  |
| Pantothenic acid (mg) | 0.05   | 0.08   | 0.08   | 0.37   | 0.31   | 0.08   | 0.18   | 0.00   | 0.08   | 0.00  |
| Vitamin B6 (mg)       | 0.03   | 0.04   | 0.06   | 0.03   | 0.05   | 0.03   | 0.02   | 0.00   | 0.01   | 0.00  |
| Folate (µg)           | 24.20  | 26.20  | 19.50  | 2.86   | 16.68  | 21.30  | 9.19   | 1.00   | 6.39   | 0.00  |
| Vitamin B12 (µg)      | 0.38   | 0.38   | 0.38   | 0.22   | 0.22   | 0.38   | 0.17   | 0.38   | 0.38   | 0.00  |

\*Almond and oat-based drinks were added to SUSTable while other PBDL products were already included.

<sup>a</sup>source: Alpro®, internal data

<sup>b</sup>source: Rööös et al., 2018

<sup>c</sup>source: BIO by Deloitte

**Supplemental File S3 Table S2. Number of foods per food subgroup**

| Food group (n=8)                 | Subgroup (n=33)                                               | Number of foods |
|----------------------------------|---------------------------------------------------------------|-----------------|
| Fruits & vegetables <sup>a</sup> | Vegetables <sup>b</sup>                                       | 25              |
|                                  | Fruits <sup>c</sup>                                           | 17              |
|                                  | Dried fruits & oilseeds                                       | 2               |
| Grains & potatoes                | Refined grains                                                | 9               |
|                                  | Whole grains                                                  | 3               |
|                                  | Potatoes                                                      | 3               |
| Meat/fish/eggs & legumes         | Eggs                                                          | 2               |
|                                  | Fish & seafoods                                               | 10              |
|                                  | Deli meat                                                     | 8               |
|                                  | Ruminant meat                                                 | 3               |
|                                  | Pork & poultry <sup>d</sup>                                   | 8               |
|                                  | Pulses & legumes                                              | 2               |
|                                  | Plant protein products <sup>e</sup>                           | 2               |
| Composite dishes                 | Animal-based dishes                                           | 7               |
|                                  | Plant-based dishes                                            | 3               |
|                                  | Sandwiches/savoury pies/fried specialities & related products | 5               |
| Dairy products & alternatives    | Milk                                                          | 4               |
|                                  | Yogurt                                                        | 5               |
|                                  | Cheese                                                        | 8               |
|                                  | PBDAs*                                                        | 3               |
| Sweetened & salty products       | Dairy desserts & alternatives*                                | 5               |
|                                  | Cakes & pies <sup>f</sup>                                     | 15              |
|                                  | Biscuits & sweets                                             | 14              |
|                                  | Sweetened breakfast cereals                                   | 3               |
|                                  | Salty appetizers                                              | 2               |
| Water & drinks                   | Water                                                         | 9               |
|                                  | Coffee/tea & infusions                                        | 3               |
|                                  | Sweetened drinks*                                             | 7               |
|                                  | Fruit juices <sup>g</sup>                                     | 6               |
|                                  | Alcoholic beverages                                           | 5               |
| Fats & seasonings                | Animal fats                                                   | 4               |
|                                  | Vegetable fats                                                | 9               |
|                                  | Seasonings                                                    | 3               |

\*food subgroups containing PBDL products

<sup>a</sup>including oilseeds

<sup>b</sup>including soups

<sup>c</sup>including processed fruits, excluding fruit juices

<sup>d</sup>including offal

<sup>e</sup>including tofu

<sup>f</sup>including pastries

<sup>g</sup>fruit juices with no added sugar

**Supplemental File S3 Table S3. List of nutritional constraints included in the models**

| Nutrients <sup>1</sup> | Unit   | Age | Gender | Lower bound                    | Upper bound      |
|------------------------|--------|-----|--------|--------------------------------|------------------|
| Energy                 | kcal   | All | All    | −1% observed TEI               | +1% observed TEI |
| Proteins               | g/kg/d | All | All    | 0.83                           |                  |
| Total carbohydrates    | %TEI   | All | All    | 50                             | 75               |
| Free sugars            | %TEI   | All | All    |                                | 10 or OI*†       |
| Total fats             | %TEI   | All | All    | 20                             | 35               |
| PUFA                   | %TEI   | All | All    | 6                              | 11               |
| ALA                    | %TEI   | All | All    | 0.5                            | ≥0.5             |
| LA                     | %TEI   | All | All    | 2.5                            | 9                |
| EPA+DHA                | mg/d   | All | All    | 250                            |                  |
| SFA                    | %TEI   | All | All    |                                | 10 or OI*†       |
| Omega 3                | %TEI   | All | All    | 0.5                            | 2                |
| Cholesterol            | mg/d   | All | All    |                                | 300              |
| Water                  | g/d    | All | M      | 2,500                          |                  |
| Water                  | g/d    | All | W      | 2,000                          |                  |
| Sodium                 | mg/d   | All | M      | 1,500                          | 2759 or OI*†     |
| Sodium                 | mg/d   | All | W      | 1,500                          | 2365 or OI*†     |
| Fibre                  | g/d    | All | All    | EAR or OI* or RDA <sup>§</sup> |                  |

| Nutrients <sup>1</sup> | Unit     | Age   | Gender | EAR  | RDA  | Upper bound |
|------------------------|----------|-------|--------|------|------|-------------|
| Fibre                  | g/d      | All   | All    | 23   | 30   |             |
| Calcium                | mg/d     | 18    | All    | 924  | 1200 |             |
| Calcium                | mg/d     | 19–55 | All    | 693  | 900  |             |
| Calcium                | mg/d     | 56–65 | M      | 693  | 900  |             |
| Calcium                | mg/d     | 56–65 | W      | 924  | 1200 |             |
| Calcium                | mg/d     | >65   | All    | 924  | 1200 |             |
| Copper                 | mg/d     | 18–65 | M      | 1.5  | 2    |             |
| Copper                 | mg/d     | 18–65 | W      | 1.2  | 1.5  |             |
| Copper                 | mg/d     | >65   | All    | 1.2  | 1.5  |             |
| Iron                   | mg/d     | 18–19 | M      | 9    | 12   |             |
| Iron                   | mg/d     | 18–19 | W      | 11   | 14   |             |
| Iron                   | mg/d     | 20–55 | M      | 6.9  | 9    |             |
| Iron                   | mg/d     | 20–55 | W      | 12   | 16   |             |
| Iron                   | mg/d     | >55   | All    | 6.9  | 9    |             |
| Iodine                 | µg/d     | All   | All    | 116  | 150  |             |
| Potassium              | mg/d     | All   | All    | 2387 | 3100 |             |
| Magnesium              | mg/d     | All   | M      | 323  | 420  |             |
| Magnesium              | mg/d     | All   | W      | 277  | 360  |             |
| Phosphorus             | mg/d     | 18    | All    | 630  | 800  |             |
| Phosphorus             | mg/d     | 19–55 | All    | 578  | 750  |             |
| Phosphorus             | mg/d     | >56   | M      | 578  | 750  |             |
| Phosphorus             | mg/d     | >56   | W      | 616  | 800  |             |
| Selenium               | µg/d     | 18–19 | All    | 39   | 50   | 350         |
| Selenium               | µg/d     | 20–55 | M      | 46   | 60   | 350         |
| Selenium               | µg/d     | 20–55 | W      | 39   | 50   | 350         |
| Selenium               | µg/d     | 56–65 | All    | 46   | 60   | 350         |
| Selenium               | µg/d     | >65   | M      | 54   | 70   | 350         |
| Selenium               | µg/d     | >65   | W      | 46   | 60   | 350         |
| Zinc                   | mg/d     | 18–19 | All    | 8    | 11   | 50          |
| Zinc                   | mg/d     | 20–55 | M      | 9.2  | 12   | 50          |
| Zinc                   | mg/d     | 20–55 | W      | 7.7  | 10   | 50          |
| Zinc                   | mg/d     | 56–65 | M      | 9.2  | 12   | 50          |
| Zinc                   | mg/d     | 56–65 | W      | 8.5  | 11   | 50          |
| Zinc                   | mg/d     | >65   | All    | 8.5  | 11   | 50          |
| Vitamin A              | RE eq./d | All   | M      | 616  | 800  | 1800        |
| Vitamin A              | RE eq./d | All   | W      | 462  | 600  | 1800        |
| Thiamin                | mg/d     | All   | M      | 1    | 1.3  |             |
| Thiamin                | mg/d     | All   | W      | 0.85 | 1.1  |             |
| Riboflavin             | mg/d     | All   | M      | 1.2  | 1.6  |             |

|                         |      |     |     |     |     |       |
|-------------------------|------|-----|-----|-----|-----|-------|
| <b>Riboflavin</b>       | mg/d | All | W   | 1.2 | 1.5 |       |
| <b>Niacin</b>           | mg/d | All | M   | 11  | 14  | 47    |
| <b>Niacin</b>           | mg/d | All | W   | 8.5 | 11  | 47    |
| <b>Pantothenic acid</b> | mg/d | All | All | 3.9 | 5   |       |
| <b>Vitamin B6</b>       | mg/d | All | M   | 1.4 | 1.8 | 6.8   |
| <b>Vitamin B6</b>       | mg/d | All | W   | 1.2 | 1.5 | 6.8   |
| <b>Folate</b>           | µg/d | All | W   | 254 | 330 | 1,500 |
| <b>Folate</b>           | µg/d | All | M   | 231 | 300 | 1,500 |
| <b>Vitamin B12</b>      | µg/d | All | All | 1.8 | 2.4 |       |
| <b>Ascorbic acid</b>    | mg/d | All | All | 85  | 110 | 1,110 |
| <b>Vitamin E</b>        | mg/d | All | All | 9.2 | 12  | 52    |

TEI: total energy intake; \* Observed intake (OI); † OI was used for nutrients to be reduced if obs<recommended daily allowance (RDA) as an upper bound, to avoid deterioration of the observed diet; § Constraints took into account the age and gender of each individual, and the level of the OI for each nutrient. The minimum levels imposed were as follows: at least the estimated average requirement (EAR—set at 77% of RDA values) when OI was lower than the EAR, at least the RDA when OI was greater than the RDA, and greater than or equal to OI when OI was between the EAR and RDA.

**Supplemental File S3 Table S4. Socio-demographic characteristics of women (n=1111) according to their consumption of PBDL (plant-based “dairy-like”) products**

|                                      | All<br>(N=1111) |            | PBDL product non-<br>consumers<br>(N=1030) |            | PBDL product<br>consumers (N=81) |            | <i>Pval</i>  |
|--------------------------------------|-----------------|------------|--------------------------------------------|------------|----------------------------------|------------|--------------|
|                                      | <i>Mean</i>     | <i>Std</i> | <i>Mean</i>                                | <i>Std</i> | <i>Mean</i>                      | <i>Std</i> |              |
| <b>Age (years)</b>                   | 45.8            | 15.2       | 45.4                                       | 15.3       | 51.5                             | 13.5       | <b>0.001</b> |
| <b>Socio-occupational status (%)</b> |                 |            |                                            |            |                                  |            | 0.162        |
| Low                                  | 9.1             |            | 9.4                                        |            | 4.9                              |            |              |
| Intermediate                         | 43.7            |            | 44.0                                       |            | 40.7                             |            |              |
| High                                 | 8.1             |            | 7.7                                        |            | 13.6                             |            |              |
| Economically inactive                | 39.1            |            | 38.9                                       |            | 40.7                             |            |              |
| <b>Familial status (%)</b>           |                 |            |                                            |            |                                  |            | <b>0.032</b> |
| Couple with children                 | 30.6            |            | 31.8                                       |            | 16.1                             |            |              |
| Couple without children              | 33.0            |            | 32.4                                       |            | 40.7                             |            |              |
| Single parent household              | 9.5             |            | 9.4                                        |            | 11.1                             |            |              |
| Single without children              | 26.6            |            | 26.2                                       |            | 32.1                             |            |              |
| No answer                            | 0.2             |            | 0.2                                        |            | .                                |            |              |
| <b>Level of education (%)</b>        |                 |            |                                            |            |                                  |            | <b>0.003</b> |
| Low                                  | 18.2            |            | 18.9                                       |            | 8.6                              |            |              |
| Intermediate                         | 49.2            |            | 49.7                                       |            | 43.2                             |            |              |
| High                                 | 32.5            |            | 31.3                                       |            | 48.2                             |            |              |
| No answer                            | 0.1             |            | 0.1                                        |            | .                                |            |              |
| <b>IPAQ score (%)</b>                |                 |            |                                            |            |                                  |            | <b>0.047</b> |
| Low                                  | 23.9            |            | 24.7                                       |            | 14.8                             |            |              |
| Middle                               | 32.2            |            | 32.4                                       |            | 29.6                             |            |              |
| High                                 | 42.5            |            | 41.6                                       |            | 54.3                             |            |              |
| No answer                            | 1.4             |            | 1.4                                        |            | 1.2                              |            |              |
| <b>Smoker (%)</b>                    |                 |            |                                            |            |                                  |            | 0.619        |
| Smoker                               | 25.6            |            | 25.7                                       |            | 23.5                             |            |              |
| Non-smoker                           | 72.4            |            | 72.1                                       |            | 75.3                             |            |              |
| No answer                            | 2.1             |            | 2.1                                        |            | 1.2                              |            |              |

**Supplemental File S3 Table S5. Mean energy content, mean diet weight and mean food group and subgroup quantities (g/d) in observed and optimized diets according to the tracking of PBDL products in optimized diets: i.e. *OptStillNoPB* (n=476), *OptStillPB* (n=78) and *OptAddedPB* (n=523)**

|                                     | <i>OptStillNoPB</i> (n=476) |       |                     |       | <i>OptAddedPB</i> (n=523) |       |                    |       | <i>OptStillPB</i> (n=78) |       |                     |       | p-value<br>Observed | p-value<br>Optimised |
|-------------------------------------|-----------------------------|-------|---------------------|-------|---------------------------|-------|--------------------|-------|--------------------------|-------|---------------------|-------|---------------------|----------------------|
|                                     | Observed<br>Mean            | Std   | Optimised<br>Mean   | Std   | Observed<br>Mean          | Std   | Optimised<br>Mean  | Std   | Observed<br>Mean         | Std   | Optimised<br>Mean   | Std   | Pval                | Pval                 |
| Total energy content (kcal/d)       | 2119.0                      | 438.5 | 2104.4              | 427.7 | 1755.9                    | 373.1 | 1751.3             | 362.6 | 2001.0                   | 420.3 | 1986.2              | 410.6 | <0.001              | <0.001               |
| Total diet weight (g/d)             | 2961.4                      | 680.1 | 2984.7              | 580   | 2249.2                    | 639.3 | 2582.8             | 411.8 | 2878.7                   | 776.3 | 2945.8              | 604.4 | <0.001              | <0.001               |
| Fruits & vegetables <sup>a</sup>    | 458.1                       | 244.2 | 520.9               | 178.9 | 334.1                     | 185.0 | 470.0              | 122.7 | 545.5                    | 250.1 | 566.4 <sup>ns</sup> | 207.3 | <0.001              | <0.001               |
| Vegetables <sup>b</sup>             | 263.8                       | 149.1 | 250.4 <sup>ns</sup> | 113.9 | 203.3                     | 120.8 | 233.9              | 96.2  | 306.0                    | 154.7 | 282.6 <sup>ns</sup> | 119.7 | <0.001              | 0.046                |
| Fruits <sup>c</sup>                 | 191.2                       | 155.3 | 257.0               | 133.3 | 128.6                     | 107.0 | 224.1              | 88.3  | 231.6                    | 173.9 | 268.2 <sup>ns</sup> | 149.2 | <0.001              | 0.003                |
| Dried fruits & oilseeds             | 3.1                         | 6.9   | 13.5                | 4.5   | 2.2                       | 4.7   | 12.0               | 4.2   | 7.9                      | 12.7  | 15.6                | 9.4   | <0.001              | <0.001               |
| Grains & potatoes                   | 240.1                       | 94.2  | 318.3               | 66.2  | 202.5                     | 75.7  | 301.2              | 60.3  | 206.6                    | 84.9  | 308.5               | 57.5  | <0.001              | <0.001               |
| Refined grains                      | 169.8                       | 78.6  | 206.2               | 60.2  | 148.2                     | 64.8  | 185.8              | 59.5  | 128.8                    | 70.5  | 189.5               | 56.1  | <0.001              | <0.001               |
| Whole grains                        | 11.6                        | 26.3  | 50.5                | 19.2  | 6.7                       | 17.6  | 49.4               | 14.6  | 33.9                     | 51.1  | 60.9                | 31.2  | <0.001              | <0.001               |
| Potatoes                            | 58.7                        | 47.9  | 61.6 <sup>ns</sup>  | 42.1  | 47.5                      | 35.9  | 66.0               | 36.7  | 43.9                     | 36.8  | 58.1                | 33.6  | <0.001              | 0.344                |
| Meat/fish/eggs & legumes            | 188.9                       | 61.5  | 116.9               | 42.7  | 157.5                     | 57.1  | 110.0              | 39.8  | 169.4                    | 69.7  | 103.1               | 44.0  | <0.001              | 0.022                |
| Eggs                                | 16.7                        | 16.6  | 14.6                | 13.6  | 14.8                      | 15.9  | 14.6 <sup>ns</sup> | 14.3  | 15.8                     | 14.2  | 14.1 <sup>ns</sup>  | 14.0  | 0.606               | 0.642                |
| Fish & seafoods                     | 35.6                        | 31.6  | 34.8 <sup>ns</sup>  | 19.3  | 27.8                      | 25.9  | 32.8               | 13.6  | 47.9                     | 37.9  | 39.8 <sup>ns</sup>  | 17.6  | <0.001              | 0.004                |
| Deli meat                           | 23.3                        | 20.7  | 3.4                 | 5.6   | 21.2                      | 19.4  | 4.4                | 6.3   | 18.7                     | 20.2  | 3.4                 | 6.1   | 0.370               | 0.007                |
| Ruminant meat                       | 44.2                        | 30.5  | 13.5                | 18.9  | 34.1                      | 28.7  | 7.9                | 14.5  | 26.9                     | 23.8  | 6.3                 | 11.6  | <0.001              | <0.001               |
| Pork & poultry <sup>d</sup>         | 58.7                        | 36.5  | 28.8                | 23.9  | 50.3                      | 31.8  | 25.9               | 22.1  | 42.2                     | 34.0  | 16.8                | 19.7  | <0.001              | 0.002                |
| Pulses & legumes                    | 10.3                        | 19.3  | 21.8                | 20.4  | 9.3                       | 18.1  | 24.3               | 19.5  | 14.0                     | 20.2  | 19.3 <sup>ns</sup>  | 20.3  | 0.190               | 0.168                |
| Plant protein products <sup>e</sup> | 0.1                         | 1.9   | 0.0 <sup>ns</sup>   | 0.7   | 0.1                       | 1.0   | 0.1                | 1.0   | 3.8                      | 14.6  | 3.4 <sup>ns</sup>   | 13.5  | <0.001              | <0.001               |
| Dairy products & alternatives       | 274.2                       | 165.5 | 265.7 <sup>ns</sup> | 151.7 | 166.3                     | 113.8 | 209.7              | 125.5 | 241.5                    | 138.6 | 252.4 <sup>ns</sup> | 129.5 | <0.001              | <0.001               |
| Milk                                | 132.6                       | 152.6 | 136.6 <sup>ns</sup> | 149.7 | 65.0                      | 99.3  | 88.8               | 103.0 | 61.4                     | 103.1 | 76.1 <sup>ns</sup>  | 102.5 | <0.001              | <0.001               |
| Yogurt                              | 107.4                       | 81.1  | 110.2 <sup>ns</sup> | 80.0  | 71.3                      | 67.3  | 68.9 <sup>ns</sup> | 64.1  | 68.8                     | 75.3  | 66.9 <sup>ns</sup>  | 74.9  | <0.001              | <0.001               |
| Cheese                              | 34.2                        | 26.1  | 18.9                | 15.1  | 30.0                      | 19.7  | 17.1               | 13.9  | 30.9                     | 23.4  | 18.3                | 13.5  | 0.047               | 0.354                |
| PBDAs                               | 0.0                         | 0.0   | 0.0                 | 0.0   | 0.0                       | 0.0   | 34.9               | 69.5  | 80.3                     | 93.2  | 91.1 <sup>ns</sup>  | 103.1 | <0.001              | <0.001               |
| Sweetened & salty products          | 131.8                       | 78.7  | 118.5               | 67.5  | 118.5                     | 69.7  | 91.9               | 60.9  | 126.0                    | 61.2  | 113.2 <sup>ns</sup> | 57.1  | 0.004               | <0.001               |
| Dairy desserts & alt.               | 19.4                        | 33.0  | 16.8 <sup>ns</sup>  | 29.3  | 17.1                      | 33.3  | 19.3 <sup>ns</sup> | 27.6  | 19.5                     | 25.9  | 20.0 <sup>ns</sup>  | 26.0  | 0.211               | 0.486                |
| Incl. soya-based dessert            | 0.0                         | 0.0   | 0.0                 | 0.0   | 0.0                       | 0.0   | 4.7                | 13.1  | 9.6                      | 20.8  | 10.7                | 21.1  | <0.001              | <0.001               |
| Cakes & pies <sup>f</sup>           | 64.2                        | 54.0  | 57.0                | 49.0  | 62.4                      | 46.0  | 41.1               | 42.7  | 57.2                     | 44.8  | 47.0 <sup>ns</sup>  | 46.8  | 0.522               | <0.001               |
| Biscuits & sweets                   | 37.6                        | 31.7  | 31.1                | 25.5  | 34.4                      | 29.3  | 25.2               | 21.2  | 41.4                     | 31.5  | 33.0 <sup>ns</sup>  | 21.9  | 0.056               | 0.001                |

|                             |         |       |                      |       |        |       |                     |       |        |       |                      |       |        |        |
|-----------------------------|---------|-------|----------------------|-------|--------|-------|---------------------|-------|--------|-------|----------------------|-------|--------|--------|
| Sweetened breakfast cereals | 8.1     | 18.9  | 9.2 <sup>ns</sup>    | 18.9  | 2.4    | 7.8   | 2.9 <sup>ns</sup>   | 8.7   | 6.0    | 12.3  | 8.1 <sup>ns</sup>    | 14.1  | <0.001 | <0.001 |
| Salty appetizers            | 2.4     | 5.6   | 4.5                  | 5.6   | 2.3    | 5.7   | 3.4                 | 5.2   | 1.9    | 3.9   | 5.1                  | 5.0   | 0.727  | <0.001 |
| Water & drinks              | 1,610.6 | 630.0 | 1606.5 <sup>ns</sup> | 589.8 | 1221.2 | 599.2 | 1372.1              | 479.4 | 1535.9 | 681.8 | 1570.0 <sup>ns</sup> | 616.8 | <0.001 | <0.001 |
| Water                       | 928.6   | 586.6 | 949.1 <sup>ns</sup>  | 562.3 | 705.9  | 520.5 | 835.0               | 455.5 | 814.4  | 535.7 | 853.8 <sup>ns</sup>  | 493.8 | <0.001 | 0.001  |
| Coffee/tea & infusions      | 471.6   | 418.5 | 467.3 <sup>ns</sup>  | 417.5 | 361.7  | 306.0 | 357.5 <sup>ns</sup> | 301.2 | 559.1  | 433.4 | 554.6 <sup>ns</sup>  | 433.0 | <0.001 | <0.001 |
| Sweetened drinks            | 71.2    | 199.7 | 61.1 <sup>ns</sup>   | 135.8 | 42.0   | 121.6 | 80.1                | 94.6  | 22.9   | 52.4  | 35.3 <sup>ns</sup>   | 63.1  | 0.001  | 0.116  |
| <b>Incl. PB drinks</b>      | 0.0     | 0.0   | 0.0                  | 0.0   | 0.0    | 0.0   | 42.5                | 51    | 0.0    | 0.0   | 15.1                 | 31.7  | .      | <0.001 |
| Fruit juices <sup>g</sup>   | 63.9    | 90.3  | 59.0 <sup>ns</sup>   | 81.7  | 51.1   | 74.2  | 47.5 <sup>ns</sup>  | 68.8  | 62.1   | 83.0  | 58.5 <sup>ns</sup>   | 73.5  | 0.010  | 0.013  |
| Alcoholic beverages         | 75.3    | 115.9 | 69.9 <sup>ns</sup>   | 107.6 | 60.5   | 92.7  | 51.9 <sup>ns</sup>  | 85.6  | 77.4   | 88.2  | 67.7 <sup>ns</sup>   | 86.9  | 0.520  | 0.157  |
| Fats & seasonings           | 57.4    | 25.2  | 37.6                 | 16.7  | 48.7   | 21.2  | 27.6                | 15.0  | 53.5   | 20.6  | 32.0                 | 16.1  | <0.001 | 0.000  |
| Animal fats                 | 17.1    | 13.6  | 4.3                  | 6.1   | 15.8   | 12.0  | 3.7                 | 5.6   | 12.0   | 9.1   | 2.8                  | 4.4   | 0.016  | 0.057  |
| Vegetable fats              | 28.3    | 16.6  | 29.6                 | 14.3  | 22.1   | 14.1  | 19.1                | 11.4  | 32.0   | 15.3  | 26.1                 | 13.6  | <0.001 | 0.000  |
| Seasonings                  | 12.1    | 11.5  | 3.7                  | 5.1   | 10.8   | 10.3  | 4.8                 | 5.9   | 9.6    | 8.3   | 3.1                  | 5.1   | 0.035  | 0.011  |

<sup>ns</sup> indicates food groups or subgroups for which the differences (accounting for repeated measurements) between observed and optimized diets **WERE NOT** significant (p>0.05) among *OptStillNoPB*, *OptStillPB* or *OptAddedPB* women

<sup>a</sup>including oilseeds

<sup>b</sup>including soups

<sup>c</sup>including processed fruits, excluding fruit juices

<sup>d</sup>including offal

<sup>e</sup>including tofu

<sup>f</sup>including pastries

<sup>g</sup>fruit juices with no added sugar

**Supplemental File S3 Table S6. Average variations of food group and subgroup quantities (in g/d) between observed and optimized diets using fortified (1077 feasible diets) or unfortified (1074 feasible diets) PBDL products**

|                                     | <i>Fortified model</i> |            | <i>Unfortified model</i> |            |
|-------------------------------------|------------------------|------------|--------------------------|------------|
|                                     | <i>n=1077</i>          |            | <i>n=1074</i>            |            |
|                                     | <i>Mean</i>            | <i>Std</i> | <i>Mean</i>              | <i>Std</i> |
| Fruits and vegetables <sup>a</sup>  | 95.3                   | 134.1      | 105.1                    | 141.3      |
| Vegetables <sup>b</sup>             | 7.2                    | 87.4       | 10.4                     | 91.4       |
| Fruits <sup>c</sup>                 | 78.1                   | 84.9       | 84.5                     | 88.7       |
| Dried fruits & oilseeds             | 9.9                    | 4.3        | 10.2                     | 4.1        |
| Grains & potatoes                   | 89.9                   | 57.5       | 84.1                     | 55.5       |
| Refined grains                      | 38.7                   | 49.3       | 40.2                     | 49.7       |
| Whole grains                        | 39.9                   | 18.7       | 39.2                     | 18.9       |
| Potatoes                            | 11.3                   | 28         | 4.7                      | 21.1       |
| Meat/fish/eggs & legumes            | -59.7                  | 43.8       | -63.2                    | 43         |
| Eggs                                | -1.1                   | 10.9       | -1.5                     | 11         |
| Fish & seafoods                     | 1.5                    | 20.8       | 0.9                      | 21.3       |
| Deli meat                           | -18                    | 18.8       | -18.6                    | 18.9       |
| Ruminant meat                       | -27.8                  | 20.3       | -28.3                    | 20.5       |
| Pork & poultry <sup>d</sup>         | -26.9                  | 28.3       | -28.4                    | 28.3       |
| Pulses & legumes                    | 12.8                   | 15.2       | 12.8                     | 15.1       |
| Plant protein products <sup>e</sup> | -0.1                   | 1.2        | -0.1                     | 1.1        |
| Dairy products & alternatives       | 18.1                   | 76.6       | 32.1                     | 80.6       |
| Milk                                | 14.4                   | 44.7       | 38.4                     | 72.3       |
| Yogurt                              | -0.1                   | 22.8       | 2.5                      | 24.6       |
| Cheese                              | -13.9                  | 20.6       | -11.7                    | 20.8       |
| <b>PBDAs</b>                        | 17.7                   | 53.2       | 2.9                      | 16.5       |
| Sweetened & salty products          | -19.7                  | 44.7       | -20.2                    | 44.3       |
| Dairy desserts & alternatives       | -0.1                   | 16.3       | -1.7                     | 14.5       |
| <b>Incl. soya-based dessert</b>     | 2.3                    | 9.5        | 0.5                      | 5          |
| Cakes & pies <sup>f</sup>           | -14.3                  | 32.9       | -14.1                    | 33.7       |
| Biscuits & sweets                   | -8                     | 21.6       | -6.8                     | 21.7       |
| Sweetened breakfast cereals         | 0.9                    | 5.1        | 1.1                      | 5.4        |
| Salty appetizers                    | 1.7                    | 4.1        | 1.3                      | 3.8        |
| Water & drinks                      | 74                     | 205.7      | 55.3                     | 201.7      |
| Water                               | 74.6                   | 178        | 74.9                     | 180.7      |
| Coffee/tea & infusions              | -4.2                   | 28.7       | -3.6                     | 31.7       |
| Sweetened drinks                    | 15                     | 90.7       | -3.4                     | 81.8       |
| <b>Incl. PB drinks</b>              | 21.7                   | 41.9       | 3                        | 23.2       |
| Fruit juices <sup>g</sup>           | -4.2                   | 24.3       | -4.7                     | 25.3       |
| Alcoholic beverages                 | -7.2                   | 25.6       | -7.8                     | 26.7       |
| Fats & seasonings                   | -20.5                  | 19.2       | -21                      | 19.3       |
| Animal fats                         | -12.2                  | 10.9       | -12.4                    | 10.9       |
| Vegetable fats                      | -1.3                   | 14.6       | -1.4                     | 14.6       |
| Seasonings                          | -7                     | 9.2        | -7.1                     | 9.2        |

<sup>a</sup>including oilseeds

<sup>b</sup>including soups

<sup>c</sup>including processed fruits, excluding fruit juices

<sup>d</sup>including offal

<sup>e</sup>including tofu

<sup>f</sup>including pastries

<sup>g</sup>fruit juices with no added sugar

**Supplemental File S3 Table S7. Distribution of the objective function (g) in women**

|                          | N    | Mean  | Sd    | Minimum | Q1    | Median | Q3    | Maximum |
|--------------------------|------|-------|-------|---------|-------|--------|-------|---------|
| Objective function (g/d) | 1077 | 757.6 | 378.6 | 184.6   | 502.7 | 666.8  | 903.6 | 3316.17 |
| Increasing amounts (g/d) | 1077 | 467.4 | 313.2 | 70.5    | 251.6 | 369.9  | 591.1 | 2194.9  |
| Decreasing amounts (g/d) | 1077 | 290.2 | 158.9 | 85.0    | 195.2 | 250.7  | 336.3 | 2274.4  |
